# Supplementary material
Source: Springer Nature journal article supplement (https://www.springermedizin.de/resource/supplementary/12889_2012_4732_MOESM3_ESM.pdf/9493482)

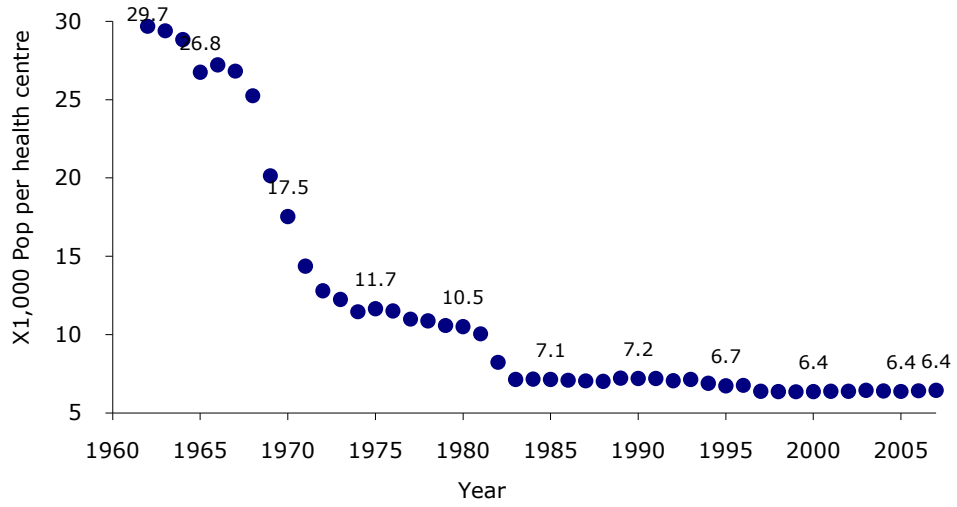

**Figure 3** 1,000 Population per health centre, 1960-2007

Supplement: MOESM3 [file 9493482]
